# Supplementary material for: An aqueous Al–PbO 2 battery with pH-gradient engineering surpasses 3.5 V
Source: Royal Society of Chemistry journal article supplement (doi:10.1039/d5cc05333a), 2025-01-01
Supplement: d5cc05333a1.pdf [file d5cc05333a1.pdf]

## Supporting Information

# Aqueous Al–PbO<sub>2</sub> Battery with pH-Gradient Engineering Surpasses 3.5 V

Yingyi Zeng, Zhiwen Lu, Kai Chen, Zhenhai Wen \*

*<sup>a</sup> State Key Laboratory of Structural Chemistry, and Fujian Provincial Key Laboratory of Materials and Techniques toward Hydrogen Energy, Fujian Institute of Research on the Structure of Matter, Chinese Academy of Sciences, Fuzhou, Fujian, 350002, China.*

*<sup>b</sup> College of Chemistry and Materials Science, Fujian Normal University, Fuzhou, 350007, China.*

*<sup>c</sup> Fujian College, University of Chinese Academy of Sciences, Fuzhou, Fujian, 350002, China.*

## Corresponding Author

Zhenhai Wen – E-mail: wen@fjirsm.ac.cn.

## Experimental Section

### Materials

All chemicals are of analytical grade and used without further purification.  $\text{HNO}_3$  and ethanol were purchased from Sinopharm. sodium dodecyl sulfate was purchased from Aladdin. Titanium mesh was purchased from Kunshan Guangjiayuan New Material Co., Ltd. The proton membrane was purchased from Dupont. Commercial Pt/C (20 wt%) was purchased from Shanghai Hesen Electric Co., Ltd. Commercial  $\text{PbO}_2/\text{Ti}$  electrodes were purchased from Suzhou Schulte Industrial Technology Co., Ltd.

### Material synthesis

#### Synthesis of $\text{PbO}_2/\text{Ti}$ electrode

The  $\text{PbO}_2/\text{Ti}$  electrode was synthesized via an electrochemical deposition method. Specifically,  $0.16 \text{ mol L}^{-1}$  lead nitrate  $\text{Pb}(\text{NO}_3)_2$  and  $0.5 \text{ g L}^{-1}$  sodium dodecyl sulfate (SDS) were dissolved in a mixture of  $500 \text{ }\mu\text{L}$  dilute nitric acid and  $80 \text{ mL}$  deionized water. The resulting acidic solution was stirred magnetically and maintained at  $65 \text{ }^\circ\text{C}$  in a thermostatic water bath to ensure complete dissolution, forming the deposition bath.

The electrodeposition was carried out in a  $100 \text{ mL}$  beaker under continuous magnetic stirring and constant temperature ( $65 \text{ }^\circ\text{C}$ ). A titanium mesh ( $10 \text{ mm} \times 20 \text{ mm}$ ) was used as the working electrode (anode), and a commercial Ru–Ir/Ti electrode of identical dimensions served as the counter electrode (cathode). The distance between the electrodes was maintained at  $1 \text{ cm}$ . A constant current density of  $250 \text{ mA cm}^{-2}$  was applied for 3 hours to fabricate the  $\text{PbO}_2/\text{Ti}$  electrode with a uniform and compact surface morphology.

### Material characterization

X-ray powder diffraction (XRD) was performed on a (Miniflex 600, Rigaku) powder x-ray diffractometer with Cu  $K\alpha$  radiation ( $\lambda = 1.54178 \text{ }\text{\AA}$ ,  $40 \text{ kV}$ ,  $15 \text{ mA}$ ) at a scan rate of  $10 \text{ }^\circ/\text{min}$ . The microscopic morphology and structure of the samples were

investigated by scanning electron microscopy (SEM, JSM6700-F) and transmission electron microscopy (TEM, TECNAI G2 F20). In situ Raman spectra were acquired with a 532 nm laser on a LabRAM HR. The x-ray photoelectron spectra (XPS) were obtained on an XPS spectrometer Thermo Scientific K-Alpha using Al K $\alpha$  rays ( $h\nu=1486.66$  eV) as the excitation source.

### Electrochemical characterization

All the galvanostatic charge-discharge (GCD) and cyclic voltammetry (CV) curves were tested on the electrochemical workstation (CHI E760) including the two electrode Al-PbO<sub>2</sub> hybrid battery and the three electrode systems containing PbO<sub>2</sub> as working electrode, reference electrode of silver chloride and counter electrode of platinum net in acid or alkaline electrolyte. The cyclic stability testing Al-PbO<sub>2</sub> hybrid battery were performed on land battery test system (LAND CT2001A). The charge time of GCD was decided by duration of charging plateau to avoid the state of overpotential and HER for maintaining the Coulombic efficiency over 90%.

### Theoretical electrochemical properties of Hybrid Acid-Alkaline Al-PbO<sub>2</sub> Battery

Discharge process:

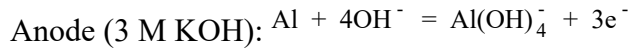

$$E_a = E_{\frac{\text{Al(OH)}_4^-}{\text{Al}}}^\theta - 2.303 \frac{RT}{2F} \log \left[ \left( \alpha_{\text{OH}^-} \right)^4 \right] = -2.328 \text{ V} - 0.0789 * \log \left( \alpha_{\text{OH}^-} \right) = -2.365 \text{ V}$$

$$E_{\frac{\text{Al(OH)}_4^-}{\text{Al}}}^\theta = -2.328 \text{ V vs. SHE}$$

(Eq. 1)

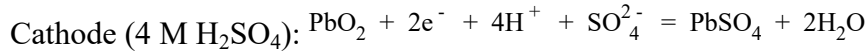

$$E_c = E_{\frac{\text{PbO}_2}{\text{PbSO}_4}}^\theta - 2.303 \frac{RT}{nF} \log \left[ \frac{\alpha_{\text{PbSO}_4} \times \alpha_{\text{H}_2\text{O}}^2}{\alpha_{\text{PbO}_2} \times \alpha_{\text{H}^+}^4 \times \alpha_{\text{SO}_4^{2-}}} \right] = 1.6711 \text{ V} + 0.1478 * \log \left( \alpha_{\text{H}^+} \right) = 1.804 \text{ V}$$

$$(E_{\frac{\text{PbO}_2}{\text{PbSO}_4}}^\theta = 1.6711 \text{ V vs. SHE})$$

(Eq. 2)

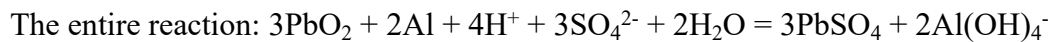

$$V_{\text{cell}} = E_c - E_a = 4.169 \text{ V}$$

(Eq. 3)

Charge process:

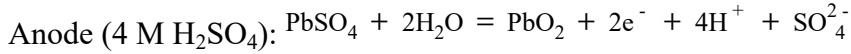

$$E_a = E_{\frac{\text{PbO}_2}{\text{PbSO}_4}}^\theta - 2.303 \frac{RT}{nF} \log \left[ \frac{\alpha_{\text{PbSO}_4} \times \alpha_{\text{H}_2\text{O}}^2}{\alpha_{\text{PbO}_2} \times \alpha_{\text{H}^+}^4 \times \alpha_{\text{SO}_4^{2-}}} \right] = 1.6711 \text{ V} + 0.1478 * \log(\alpha_{\text{H}^+}) - 1.804 \text{ V}$$

$$(E_{\frac{\text{PbO}_2}{\text{PbSO}_4}}^\theta = 1.6711 \text{ V vs. SHE})$$

(Eq. 4)

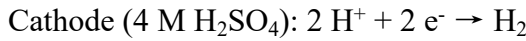

$$E_c = E_{\frac{\text{H}^+}{\text{H}_2}}^\theta - 2.303 \frac{RT}{2F} \log \left[ \frac{\alpha_{\text{H}_2}}{(\alpha_{\text{H}^+})^2} \right] = 0 \text{ V} + 0.059 * \log(\alpha_{\text{H}^+}) = 0.035 \text{ V}$$

$$(E_{\frac{\text{H}^+}{\text{H}_2}}^\theta = 0 \text{ V vs. SHE})$$

(Eq. 5)

$$V_{\text{cell}} = E_c - E_a = -1.751 \text{ V}$$

(Eq. 6)

Notes: R is the gas constant (8.314 J mol<sup>-1</sup> K<sup>-1</sup>),  $\alpha$  is the corresponding activity, F is the Faraday constant, 96485 C mol<sup>-1</sup>, and T is 298.15 K.

From the comparison of the following chemical equations, it can be seen that the voltage of the Al-PbO<sub>2</sub> battery is higher than that of the conventional lead-acid battery.

Al-PbO<sub>2</sub> battery:

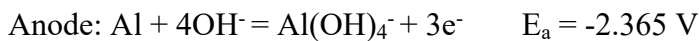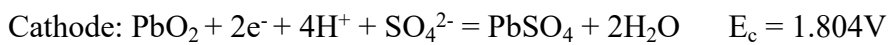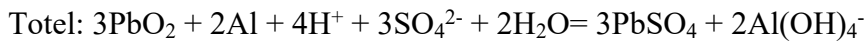

$$E_{\text{cell}} = E_c - E_a = 4.169 \text{ V}$$

Conventional lead-acid batteries:

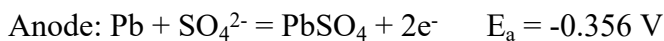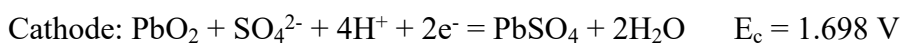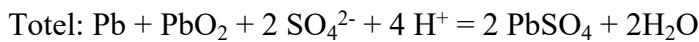

$$E_{\text{cell}} = E_c - E_a = 2.054 \text{ V}$$

### Faraday efficiency calculation

In order to monitor the H<sub>2</sub> production, we recorded the volume (V) of hydrogen produced every 10 min at a current density of 5, 10, 15, 20, and 25 mA cm<sup>-2</sup> using the drainage method. The molarity of H<sub>2</sub> (n) can be expressed by the following equation:

$$n = \frac{V}{V_m}$$

Where V<sub>m</sub> is the molar volume of the gas (24.5 L/mol)

The theoretical H<sub>2</sub> volume can be calculated by the following equation:

$$n_{\text{theo}} = \frac{Q}{N * F} = \frac{I * t}{N * F}$$

Where Q is the charge transfer, N is the number of electrons transferred to produce each H<sub>2</sub> molecule (N = 2), F is the Faraday constant (96,500 C mol<sup>-1</sup>), I is the discharge current (mA), and t is the operating time (s).

Therefore, the Faraday efficiency (FE) of H<sub>2</sub> can be calculated as follows:

$$\text{FE}(\%) = \frac{n}{n_{\text{theo}}} \times 100\%$$

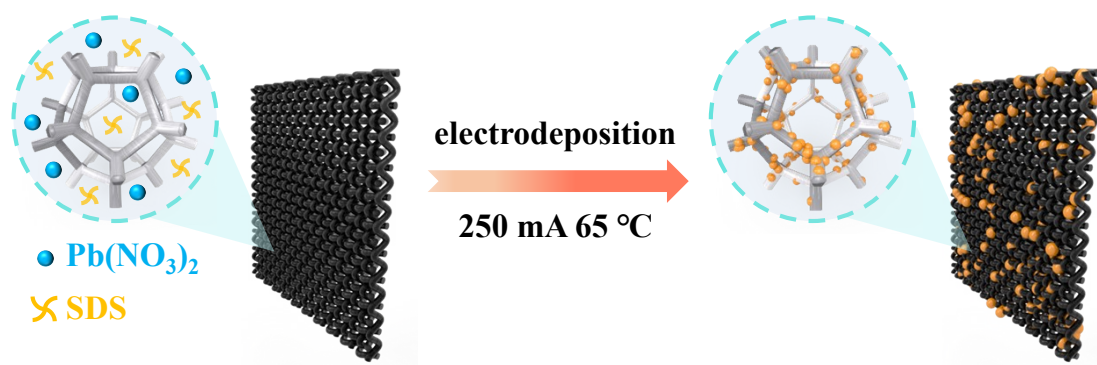

**Figure. S1** Schematic of the synthesis procedures for  $\text{PbO}_2/\text{Ti}$  electrode.

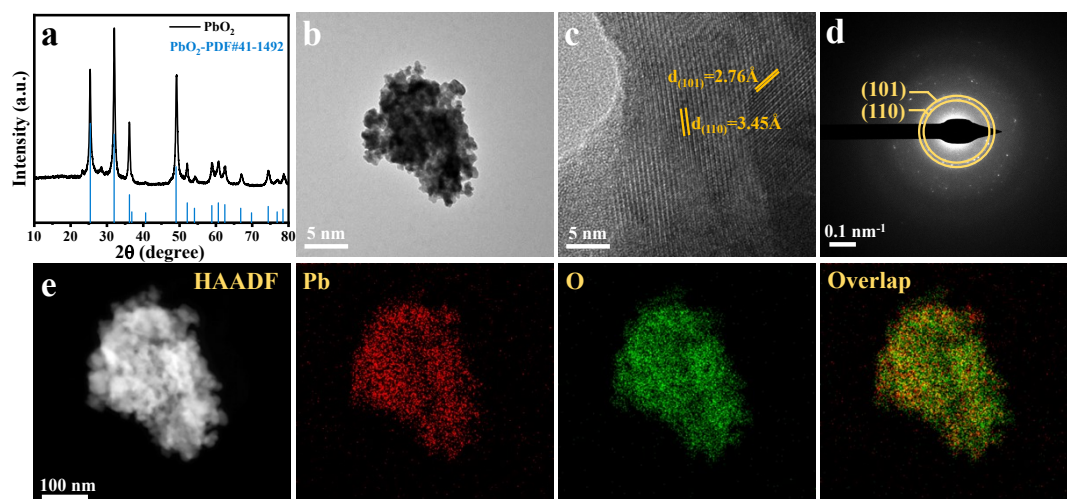

**Figure. S2** a) XRD pattern of  $\text{PbO}_2/\text{Ti}$ . b-c) HRTEM image of  $\text{PbO}_2$ . d) SAED pattern of  $\text{PbO}_2$ . e) HAADF-STEM image of a  $\text{PbO}_2$  and its EDS elemental maps of Pb and O.

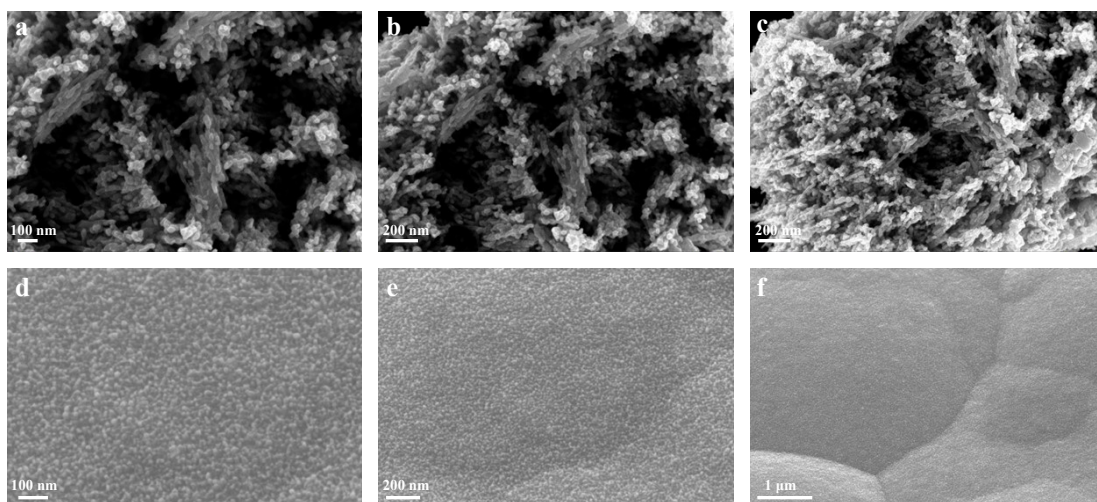

**Figure. S3** a-c)  $\text{PbO}_2$  SEM images at different scales. d-f)  $\text{PbO}_2/\text{Ti}$  SEM images at different scales.



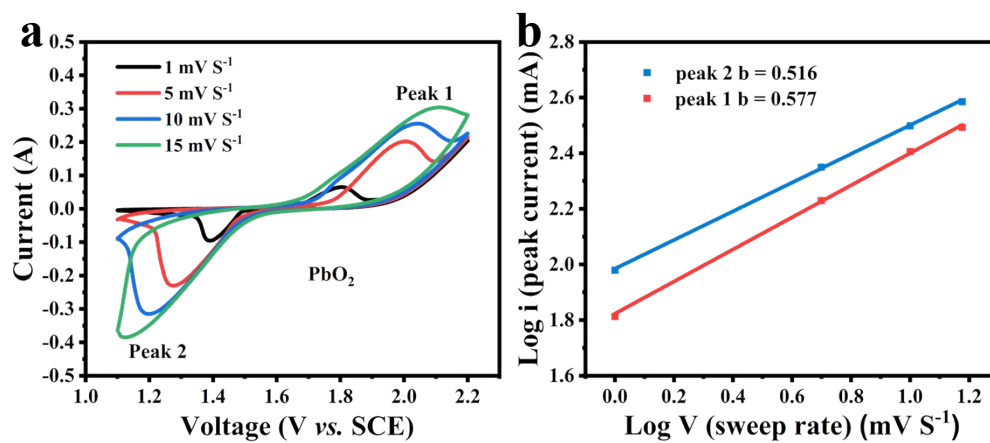

**Figure. S4** a) Cyclic voltammetry (CV) curves at different scan rates. b) plot of rate law ( $\log i$  vs.  $\log v$ ) for the two redox couples.

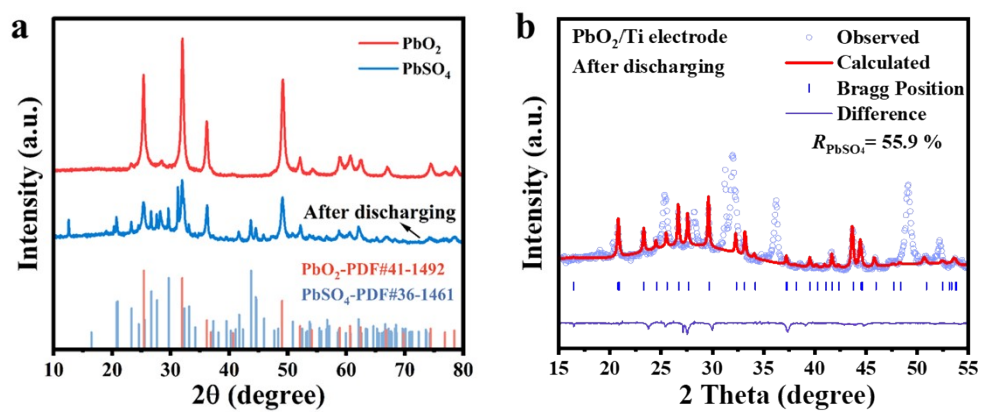

**Figure. S5** a) XRD pattern of  $\text{PbO}_2/\text{Ti}$  electrodes before and after discharging. b) Quantitative rietveld refinement analysis.

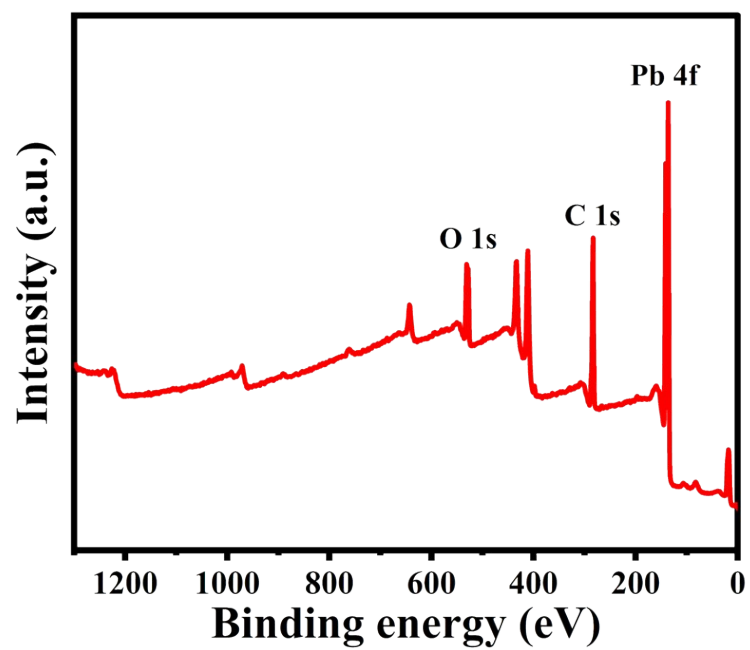

**Figure. S6** The survey XPS spectrum of PbO<sub>2</sub>/Ti electrodes.

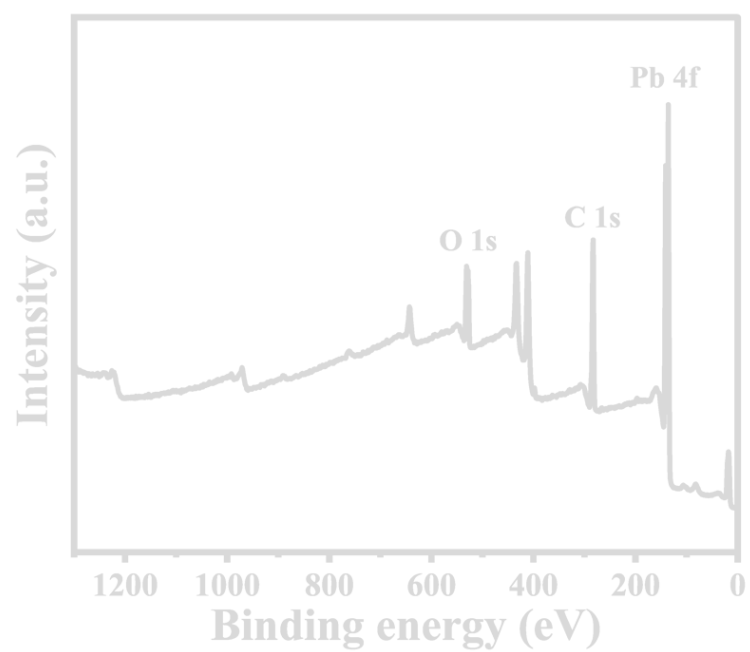

**Figure. S7** The survey XPS spectrum of PbO<sub>2</sub>/Ti electrodes after discharging.

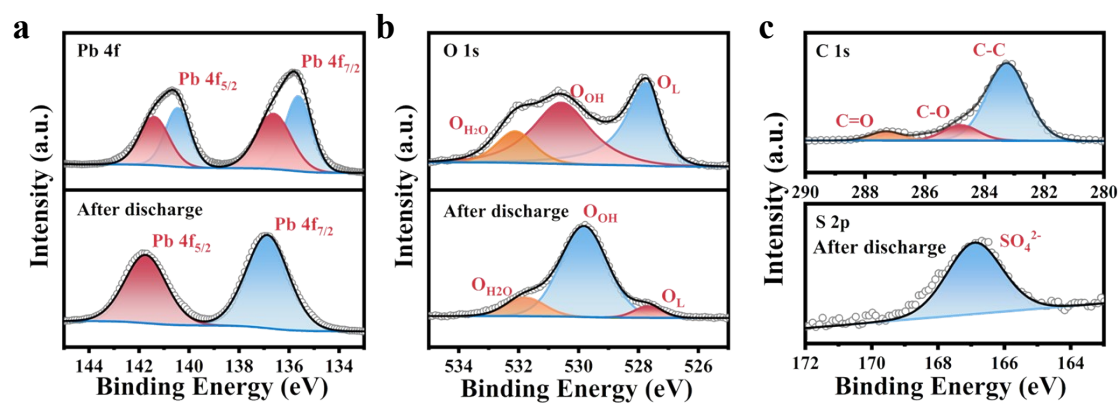

**Figure. S8** High-resolution XPS spectra of PbO<sub>2</sub>/Ti electrodes. a) Pb 4f. b) O 1s. c) C 1s and S 2p.

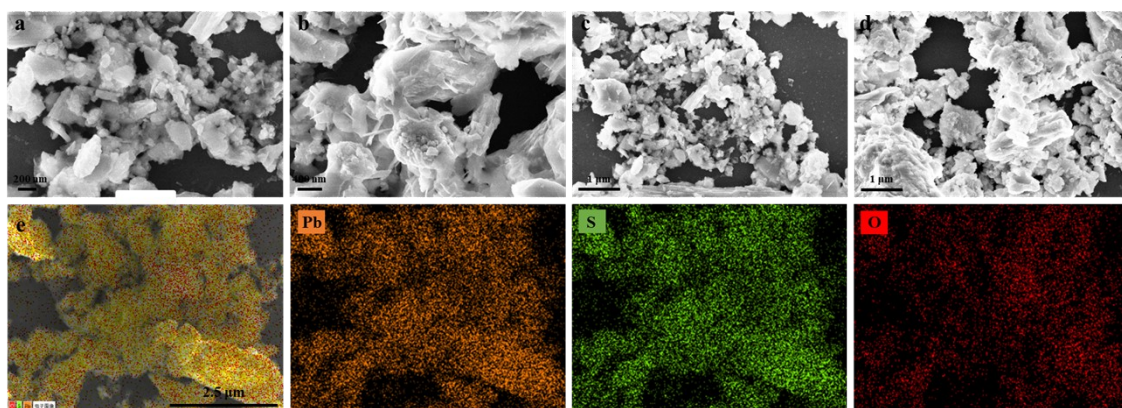

**Figure. S9** (a-d) SEM and e) EDS of the electrode after discharging.

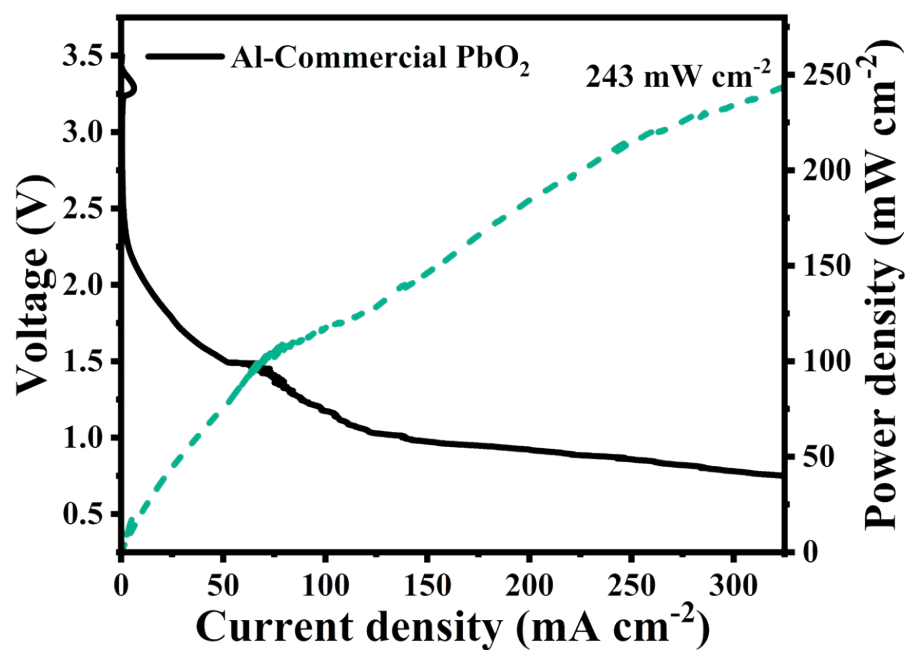

**Figure. S10** Discharging polarization curves and corresponding power density curves of Al-Commercial PbO<sub>2</sub> hybrid battery.

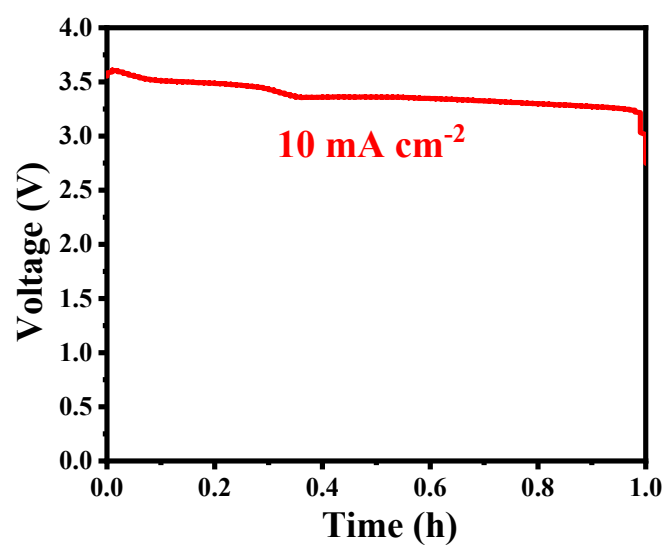

**Figure. S11** The discharge curve at a current density of  $10 \text{ mA cm}^{-2}$ .



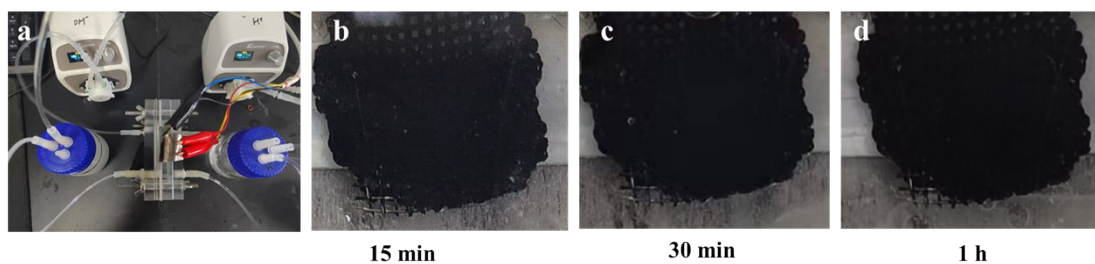

**Figure. S12** Changes on the electrode surface during the discharge process. a) Battery physical diagram. b) Discharge for 15 minutes. c) Discharge for 30 minutes. d) Discharge for 60 minutes.

Caption: As shown in the figure S12, no visible gas bubbles were observed throughout the discharge process. This provides clear experimental evidence that HER was effectively suppressed under our operational conditions.

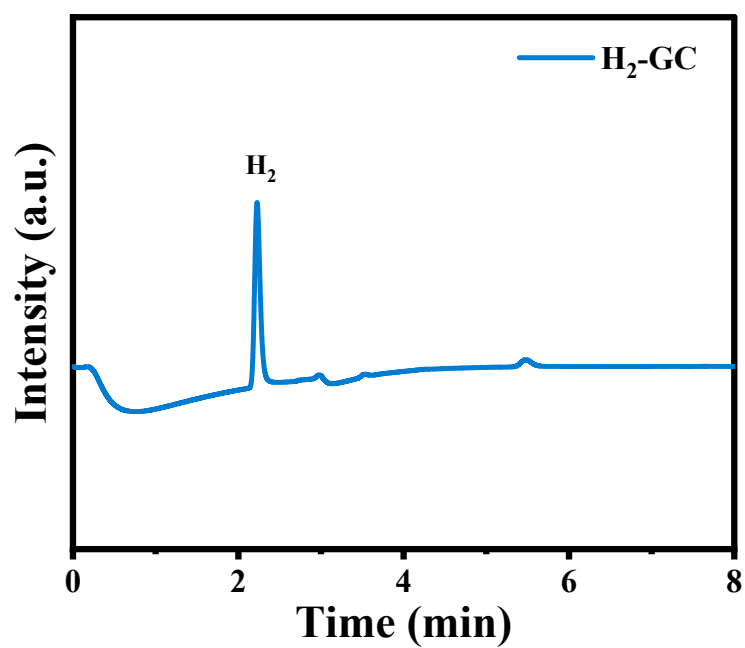

**Figure. S13** The gas chromatography curve of H<sub>2</sub> during the charging process.

Caption: Gas chromatography analysis of the gas evolved during the charging process, confirming the identity of the gas as hydrogen (H<sub>2</sub>) by comparison with a standard.

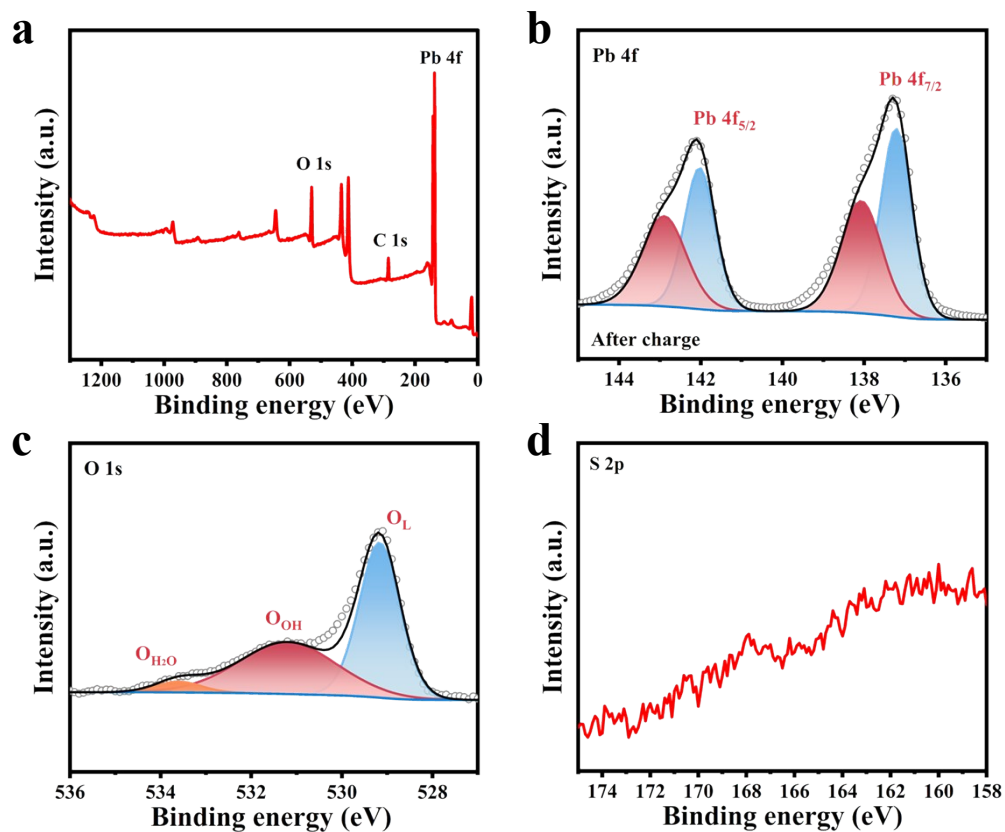

**Figure. S14** High-resolution XPS spectra of after charge  $\text{PbO}_2/\text{Ti}$  electrodes. a) The survey XPS spectrum of  $\text{PbO}_2/\text{Ti}$  electrodes after charging. b) Pb 4f. c) O 1s. d) S 2p.
